# Supplementary material for: Circular RNA circPPM1F modulates M1 macrophage activation and pancreatic islet inflammation in type 1 diabetes mellitus
Source: PubMed Central journal article supplement (PMC7532688; doi:10.7150/thno.48264), 2020-08-29
Supplement: thnov10p10908s1.pdf [file thnov10p10908s1.pdf]

## Supplementary materials

### **Circular RNA *circPPM1F* modulates M1 macrophage activation and pancreatic islet inflammation in type 1 diabetes mellitus**

Caiyan Zhang<sup>1,2#</sup>, Xiao Han<sup>1,2#</sup>, Lan Yang<sup>1,2#</sup>, Jinrong Fu<sup>1#</sup>, Chengjun Sun<sup>3</sup>, Saihua Huang<sup>1,2</sup>, Wenfeng Xiao<sup>1,2</sup>, Yajing Gao<sup>1,2</sup>, Qiuyan Liang<sup>1,2</sup>, Xiang Wang<sup>1,2</sup>, Feihong Luo<sup>3</sup>, Wei Lu<sup>3</sup>, Yufeng Zhou<sup>1,2\*</sup>

<sup>1</sup> Institute of Pediatrics, Children's Hospital of Fudan University, and the Shanghai Key Laboratory of Medical Epigenetics, International Co-laboratory of Medical Epigenetics and Metabolism, Ministry of Science and Technology, Institutes of Biomedical Sciences, Fudan University, Shanghai 200032, China

<sup>2</sup> National Health Commission (NHC) Key Laboratory of Neonatal Diseases, Fudan University, Shanghai, China

<sup>3</sup>Department of Pediatric Endocrinology and Inherited Metabolic Diseases, Children's Hospital of Fudan University, Shanghai, 201102, China

<sup>#</sup>These authors have contributed equally to this work.

<sup>\*</sup>To whom correspondence should be addressed:

Yufeng Zhou, M.D., Ph.D., 399 Wanyuan Rd, Minhang, Shanghai 201102, China

Telephone: 86-021-64932907. E-mail: yfzhou1@fudan.edu.cn

Figure S1

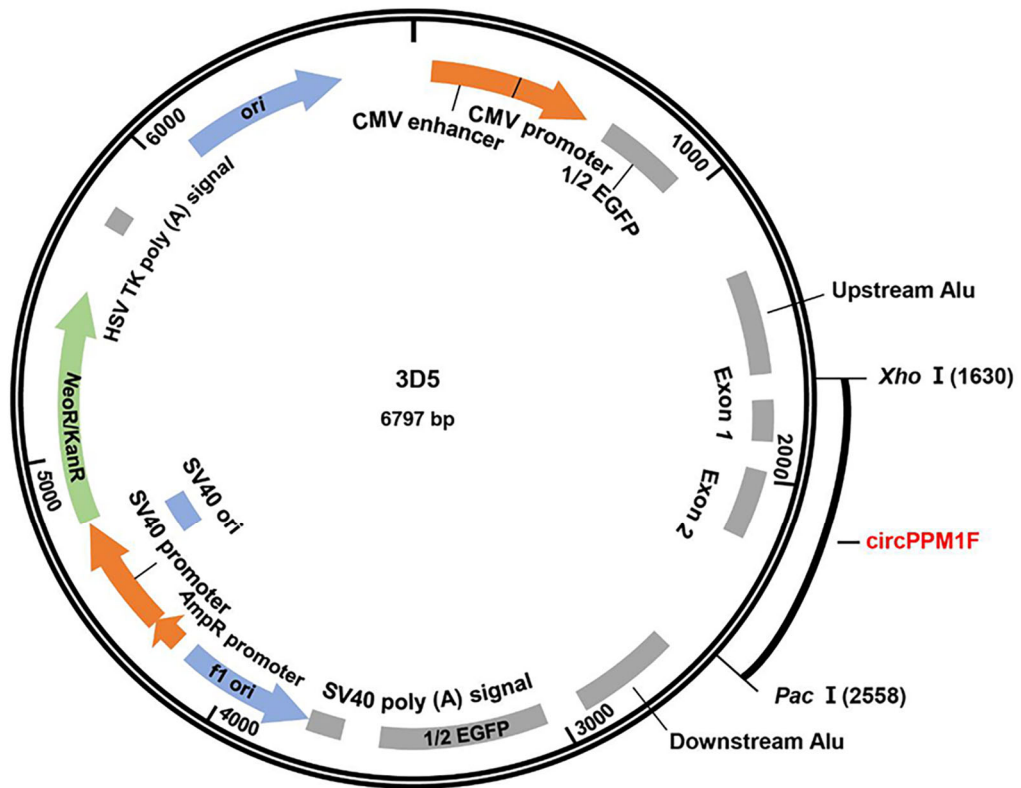

Figure S1. Schematic map of the 3D5-circPPM1F vector.

Figure S2

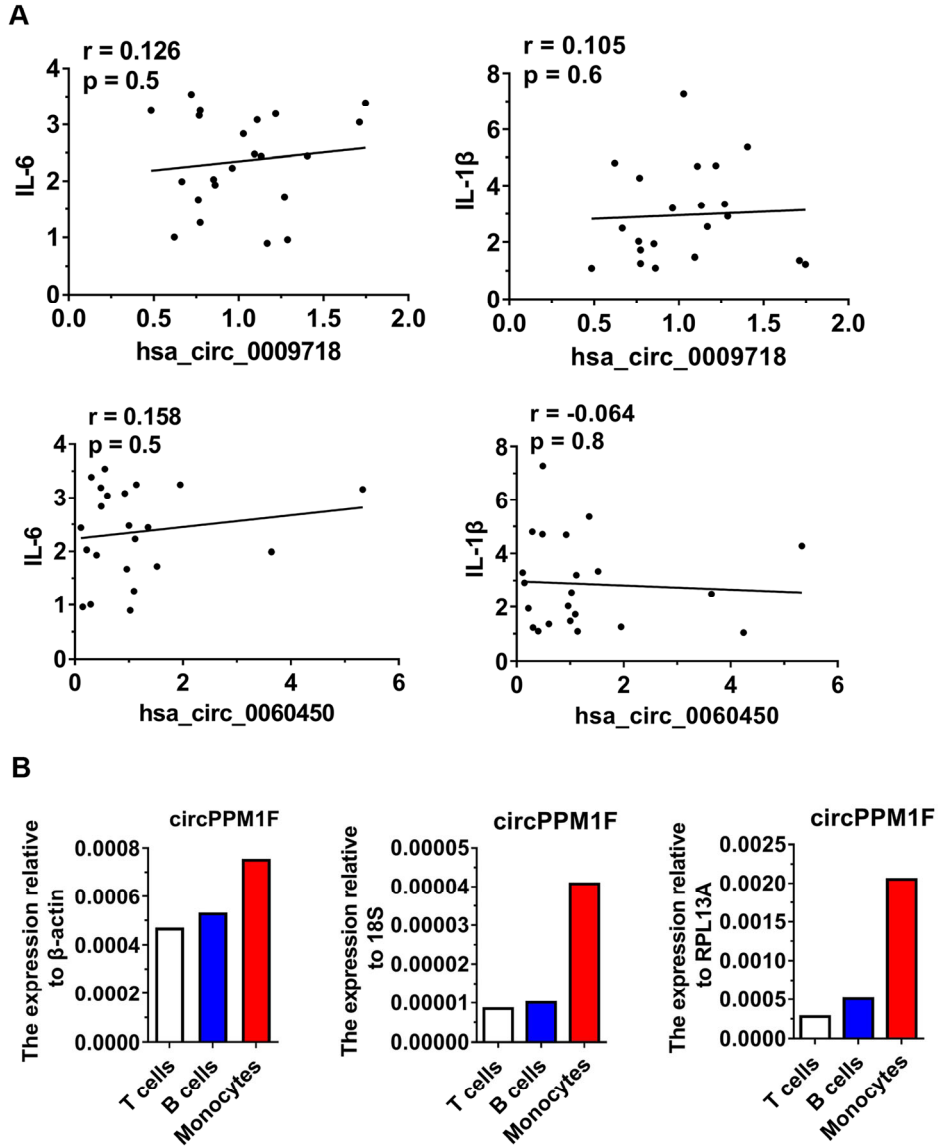

**Figure S2. Expression of circRNAs in peripheral blood mononuclear cells (PBMCs).** **A.** Correlation analysis of the expression of *hsa\_circ\_0009718* or *hsa\_circ\_0060450* and *IL-6*, or *IL-1 $\beta$*  levels in PBMCs from patients with type 1 diabetes mellitus (T1DM) ( $n = 22$ , Pearson's correlation). **B.** qRT-PCR assay was used to measure *circPPM1F* expression in monocytes, T cells, and B cells in PBMCs.

Figure S3

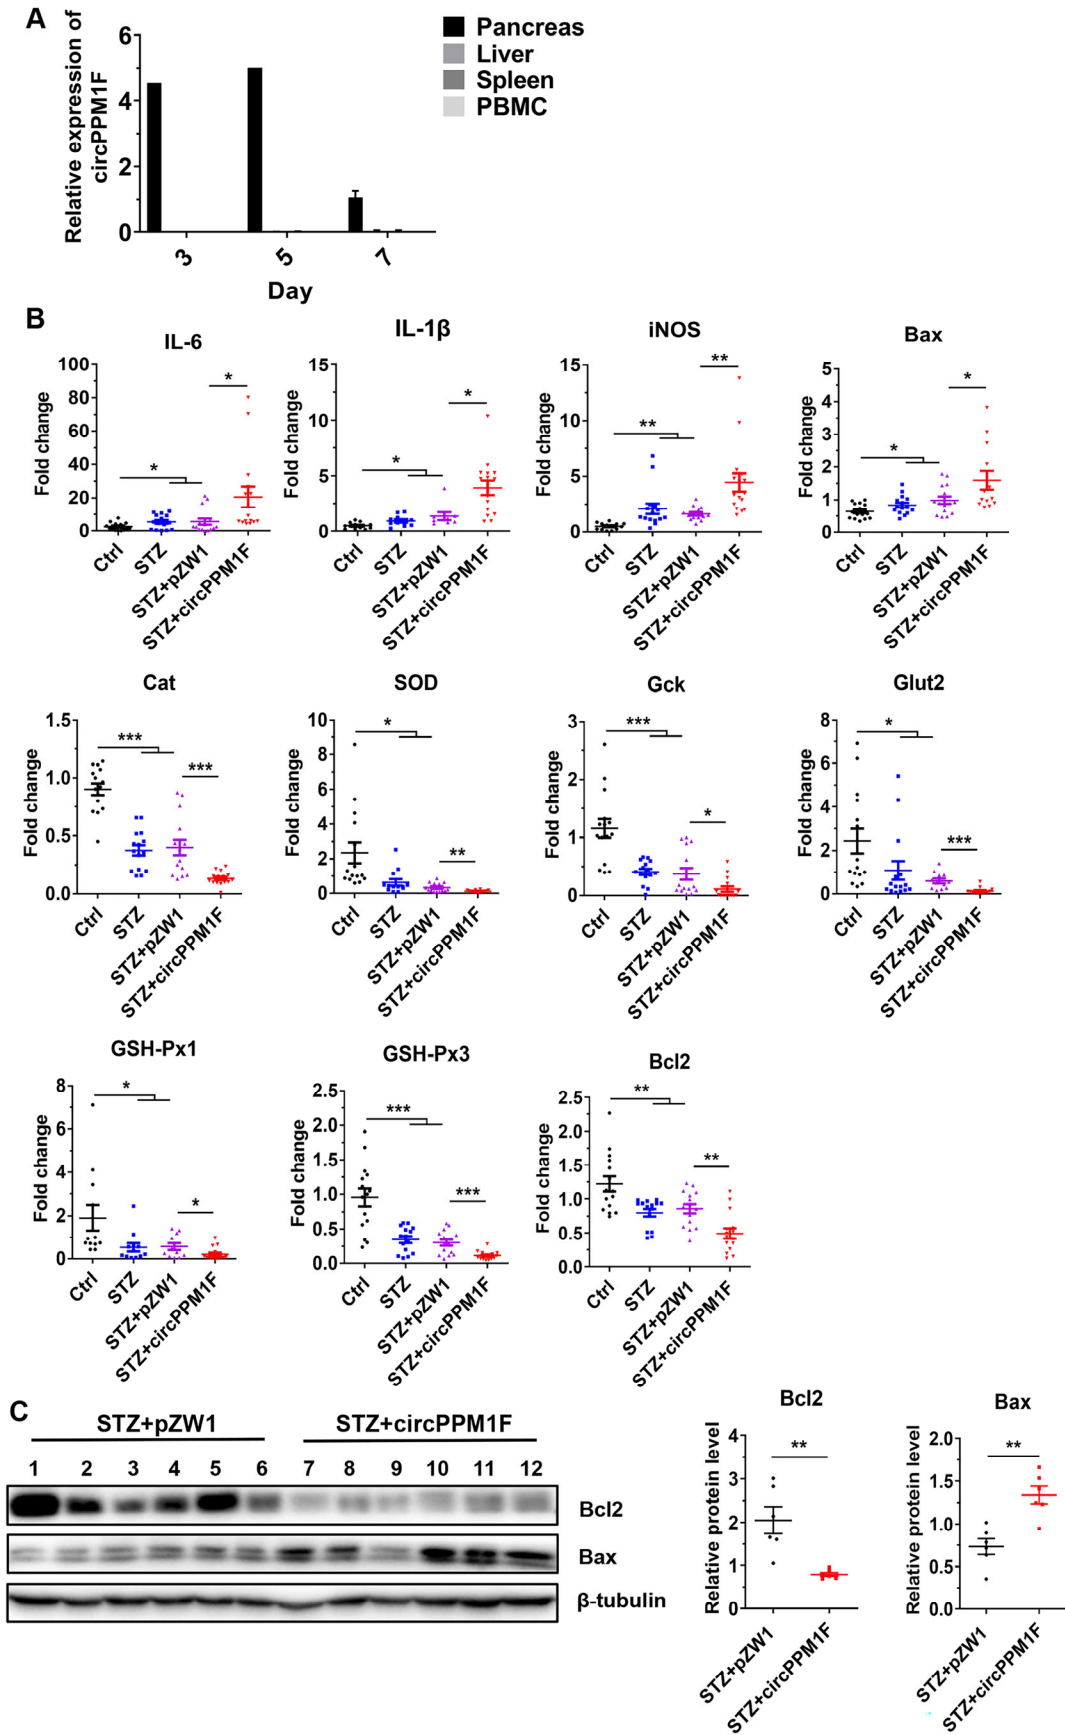

**Figure S3. The evaluation of pancreatic injury in STZ-induced diabetic mouse model.** **A.** Dynamic expression profiles of *circPPM1F* in pancreas, liver, spleen, and PBMCs from mice with injection of *circPPM1F* plasmid for 3, 5, or 7 days. **B.** qRT-PCR analyses of *IL-6*, *IL-1 $\beta$* , *iNOS*, *Bax*, *Sod2*, *Cat*, *GSH-Px-1*, *GSH-Px-3*, *Glut2*, *Gck*, and *Bcl2* expression in pancreas tissues from experimental model mice. **C.** The levels of Bcl2 and Bax protein in 6 random pancreas tissue samples from STZ-treated mice with *circPPM1F* or pZW1 injection (left). The levels of Bcl2 and Bax were normalized to those of  $\beta$ -tubulin and quantified using Image J software (right). Data are presented as means  $\pm$  SEM from three independent experiments. \* $p \leq 0.05$ , \*\* $p \leq 0.01$ , \*\*\* $p \leq 0.001$ .

**Table S1 Clinical characteristics of T1DM patients and healthy controls**

| <b>Characteristic</b>    | <b>Patients (n = 47)</b>   | <b>Healthy controls (n = 49)</b> |
|--------------------------|----------------------------|----------------------------------|
| Sex, no. (M/F)           | 22/25                      | 21/28                            |
| Age (y)                  | 8.5 ± 0.6                  | 8.0 ± 1.2                        |
| Duration (y)             | 1.8 ± 0.4                  | 0                                |
| BMI (Kg/m <sup>2</sup> ) | 16.7 ± 0.6                 | N/A                              |
| cGLU (mmoL/L)            | 18.0 ± 1.7                 | N/A                              |
| HbA1C (%)                | 11.0 ± 0.5 (ref. 4 ~ 6)    | N/A                              |
| c peptide (ng/mL)        | 0.5 ± 0.1 (ref. 1.1 ~ 4.4) | N/A                              |
| GADA, no. (+/-)          | 8/39                       | 0/49                             |
| IA-2A, no. (+/-)         | 21/26                      | 0/49                             |
| IAA, no. (+/-)           | 7/40                       | 0/49                             |
| ICA, no. (+/-)           | 9/38                       | 0/49                             |
| Urine ketone, no. (+/-)  | 14/33                      | 0/49                             |

Data for age, BMI, cGLU, HbA1C and c peptide are expressed as means ± SEM.

**Table S2 Primer sequences used for amplification**

| Name             | Usage        | Sequence ( 5'- 3')                       |
|------------------|--------------|------------------------------------------|
| $\beta$ -actin   | qPCR forward | CACCATTGGCAATGAGCGGTTC                   |
|                  | qPCR reverse | AGGTCTTTGCGGATGTCCACGT                   |
| GAPDH            | qPCR forward | GTCTCCTCTGACTTCAACAGCG                   |
|                  | qPCR reverse | ACCACCCTGTTGCTGTAGCCAA                   |
| U1               | qPCR forward | GGGAGATACCATGATCACGAAGGT                 |
|                  | qPCR reverse | CCACAAATTATGCAGTCGAGTTTCCC               |
| MALAT1           | qPCR forward | CTTAAGCGCAGCGCCATTTT                     |
|                  | qPCR reverse | CCTCAAACCCCAAGACCAA                      |
| <i>circPPM</i>   | qPCR forward | TTGTGTTCTGTGCAAGGGG                      |
| <i>IF</i>        | qPCR reverse | TGCAGCCGACAGAGTTCAGA                     |
| hsa_circ_0009718 | qPCR forward | TCACACCTAGCGAGAGCAGT                     |
|                  | qPCR reverse | TGCATACCTTGGTAGCCAGC                     |
| hsa_circ_0060450 | qPCR forward | GGGAAGCAGTGCCGTGAAC                      |
|                  | qPCR reverse | GTCCTGCTGTCCAAACTGCCT                    |
| PPM1F            | qPCR forward | GCTGCTACAGACAGACCTTTCC                   |
|                  | qPCR reverse | GGCGGTAAAGAACTCTGTGCC                    |
| HuR              | qPCR forward | TGTTCTCTCGGTTTGGGCGGAT                   |
|                  | qPCR reverse | TCTTCTGCCTCCGACCGTTTGT                   |
| TNF- $\alpha$    | qPCR forward | CTCTTCTGCCTGCTGCACTTTG                   |
|                  | qPCR reverse | ATGGGCTACAGGCTTGTCACTC                   |
| IL-6             | qPCR forward | AGACAGCCACTCACCTCTTCAG                   |
|                  | qPCR reverse | TTCTGCCAGTGCCTCTTTGCTG                   |
| IL-1 $\beta$     | qPCR forward | CCACAGACCTTCCAGGAGAATG                   |
|                  | qPCR reverse | GTGCAGTTCAGTGATCGTACAGG                  |
| CXCL10           | qPCR forward | GGTGAGAAGAGATGTCTGAATCC                  |
|                  | qPCR reverse | GTCCATCCTTGGAAGCACTGCA                   |
| EIF4A3           | qPCR forward | GGCACAGGAAAAACAGCCACCT                   |
|                  | qPCR reverse | TGTAGTCACCGAGAGCAAGCAG                   |
| FUS              | qPCR forward | CAGACAGGGAAACTGGCAAGCT                   |
|                  | qPCR reverse | GGCGAGTAGCAAATGAGACCTTG                  |
| Primer1          | Forward      | TGAGATTTTCATCAGGCTCGAGGTACGCCGCTGTCCACGT |
|                  | Reverse      | TAGGGCTTCTGGAAGACATCCCCGATGGCTCTGGAG     |
| Primer2          | Forward      | CTCCAGAGCCATCGGGGATGTCTTCCAGAAGCCCTA     |
|                  | Reverse      | GGCCAAAAACTTTTAATTAATCCTGTCACCTTCTGCTG   |

**Table S3 Sequences of NC and siRNAs**

| <b>Name</b>       | <b>Target mRNA</b> | <b>Sense sequence (5'- 3')</b> |
|-------------------|--------------------|--------------------------------|
| si-circPPM1F (-1) | <i>circPPM1F</i>   | CUGAACUCUGUCGGCUGCATT          |
| si-circPPM1F (-2) | <i>circPPM1F</i>   | CUCUGUCGGCUGCAGAGCGTT          |
| si-PPM1F (-1)     | PPM1F              | GACAGACCUUUCGAAUUCTT           |
| si-PPM1F (-2)     | PPM1F              | AGCCUGGCACAGAGUUUCUTT          |
| si-PPM1F (-3)     | PPM1F              | ACCGACCAGAUGUUUCUCATT          |
| si-HuR (-1)       | HuR                | GAACGAAUUUGAUCGUCAATT          |
| si-HuR (-2)       | HuR                | GCAGAUGUUUGGGCCGUUUTT          |
| si-HuR (-3)       | HuR                | GGCUUUGUGACCAUGACAATT          |
| si-EIF4A3 (-1)    | EIF4A3             | GCAUCUUGGUGAAACGUGATT          |
| si-EIF4A3 (-2)    | EIF4A3             | CCGAGUGCUUAUUUCUACATT          |
| si-EIF4A3 (-3)    | EIF4A3             | CGAUGAACGUUGCUGAUCUTT          |
| si-FUS (-1)       | FUS                | CAGAGUUACAGUGGUUAUATT          |
| si-FUS (-2)       | FUS                | GCCAAGAUCAAUCCUCAUTT           |
| si-FUS (-3)       | FUS                | GUGAGAAUGUUACAAUUGATT          |
| NC                | --                 | UUCUCCGAACGUGUCACGUTT          |



**Table S4 The details of all antibodies**

| <b>Description<br/>(Anti-)</b> | <b>Sources</b>               | <b>Cat./clone</b>   | <b>Dilutions<br/>/WB</b> | <b>Dilutions<br/>/IHC/IF</b> | <b>Flow<br/>cytometry</b> |
|--------------------------------|------------------------------|---------------------|--------------------------|------------------------------|---------------------------|
| PPM1F                          | Abcam,<br>Cambridge, UK      | ab200394            | 1 : 1000                 |                              |                           |
| p65                            | CST, USA                     | #4764; C22B4        | 1 : 1000                 |                              |                           |
| p-p65 (Ser536)                 | CST, USA                     | 3033S; 93H1         | 1 : 1000                 |                              |                           |
| p38                            | CST, USA                     | 9212S               | 1 : 1000                 |                              |                           |
| p-p38 (T180/Y182)              | CST, USA                     | 9216S; 28B10        | 1 : 1000                 |                              |                           |
| JNK                            | CST, USA                     | 9258S; 56G8         | 1 : 1000                 |                              |                           |
| p-JNK (T183/Y185)              | CST, USA                     | 9251S               | 1 : 1000                 |                              |                           |
| ERK1/2                         | CST, USA                     | 4695S;137F5         | 1 : 1000                 |                              |                           |
| p-ERK1/2<br>(T202/Y204)        | CST, USA                     | 4376S; 20G11        | 1 : 1000                 |                              |                           |
| mTOR                           | CST, USA                     | 2983S;7C16          | 1 : 1000                 |                              |                           |
| p-mTOR (Ser2448)               | CST, USA                     | 5536S; D9C2         | 1 : 1000                 |                              |                           |
| Stat3                          | CST, USA                     | 9139S; 124H6        | 1 : 1000                 |                              |                           |
| p-Stat3 (Y705)                 | CST, USA                     | 9131S               | 1 : 1000                 |                              |                           |
| HuR                            | CST, USA                     | #12582;<br>D9W7E    | 1 : 1000                 |                              |                           |
| Bcl2                           | CST, USA                     | 15071S; 124         | 1 : 1000                 |                              |                           |
| Bax, NT                        | EMD Millipore,<br>USA        | #06-499             | 1 : 1000                 |                              |                           |
| β-Tubulin                      | Abcam,<br>Cambridge, UK      | ab6046              | 1 : 5000                 |                              |                           |
| Ki-67                          | Signalway<br>Texas, USA      | Ab, #48871; 9N16    |                          | 1 : 500                      |                           |
| Insulin                        | Proteintech,<br>Chicago, USA | 66198-1-Ig          |                          | 1 : 1000                     |                           |
| F4/80 for IHC                  | CST, USA                     | #70076S             |                          | 1 : 500                      |                           |
| F4/80 for IF                   | Servicebio                   | GB11027             |                          | 1:8000                       |                           |
| F4/80                          | eBioscience                  | 12-4801-80;<br>BM8, |                          |                              | 0.25 µg/T                 |

---

|             |             |                      |           |
|-------------|-------------|----------------------|-----------|
| iNOS        | eBioscience | 53-5920-80;<br>CXNFT | 0.06 µg/T |
| iNOS for IF | Servicebio  | GB11119              | 1:500     |

---
